# Supplementary material
Source: HighWire-hosted journal article supplement (https://erj.ersjournals.com/content/54/1/1800353)
Supplement: inline-supplementary-material-1 [file inline-supplementary-material-1.pdf]

## Supplementary Appendices

### Analysis of loss to follow up in 4,099 multidrug-resistant pulmonary tuberculosis patients

Ian F. Walker, Oumin Shi, Joseph Hicks, Helen Elsey, Xiaolin Wei, Dick Menzies, Zhiyi Lan, Dennis Falzon, Giovanni Battista Migliori, Carlos Pérez-Guzmán, Mario H. Vargas, Lourdes García-García, José Sifuentes Osornio, Alfredo Ponce-De-León, Martie van der Walt and James N. Newell

#### Kaplan-Meier plots of individual cohorts (shaded areas are confidence intervals)

Cohort i – Canada (n=70)

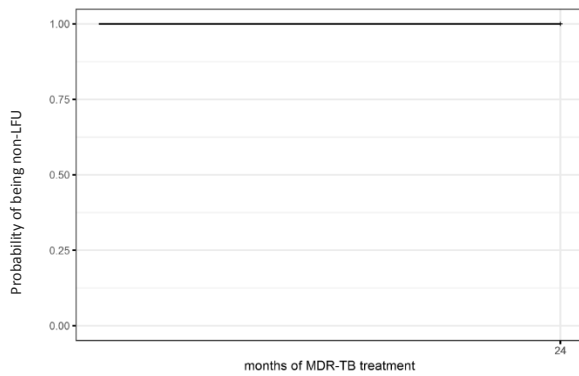

Cohort ii – USA (n=35)

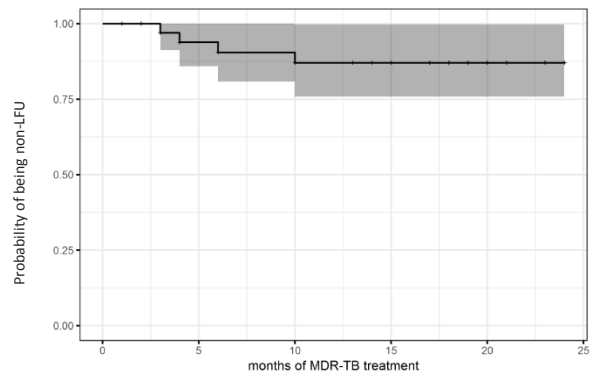

Cohort iii – Taiwan (n=120)

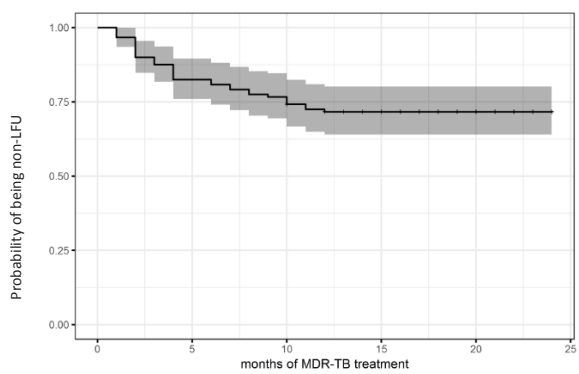

Cohort iv – Mexico (n=35)

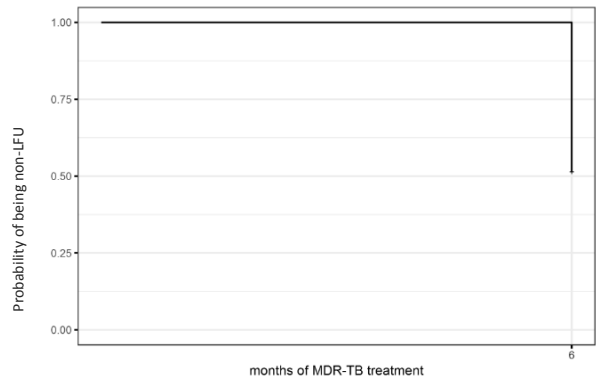

Cohort v - South Korea (n=145)

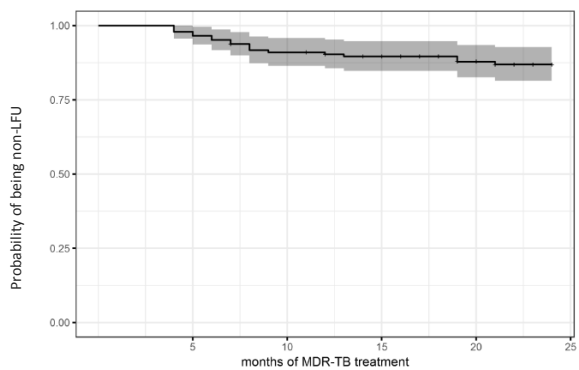

Cohort vi – Hong Kong (n=96)

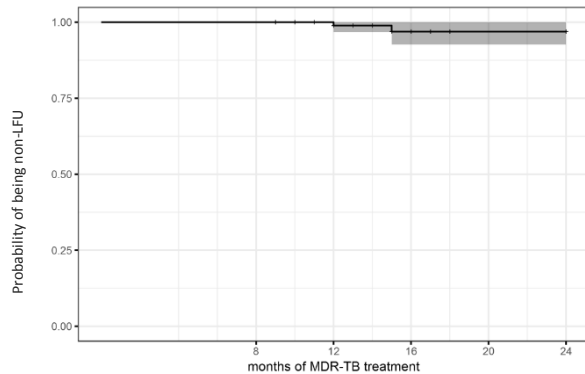

Cohort vii - Italy (n=82)

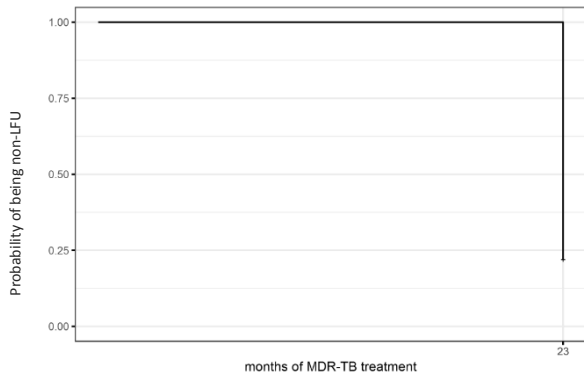

Cohort viii - Peru (n=529)

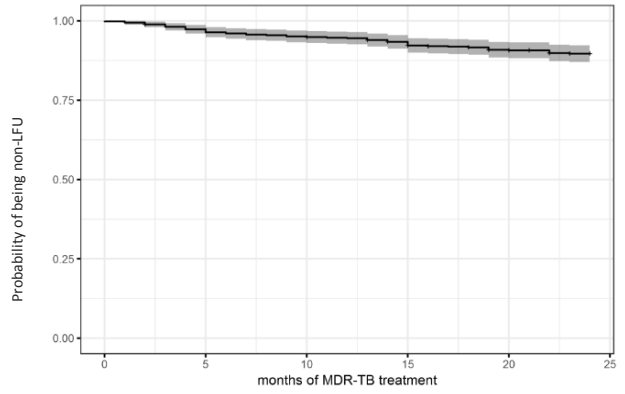

Cohort ix - Mexico (n=33)

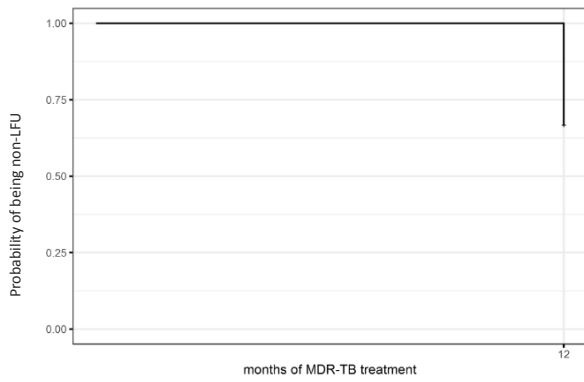

Cohort x - Argentina (n=100)

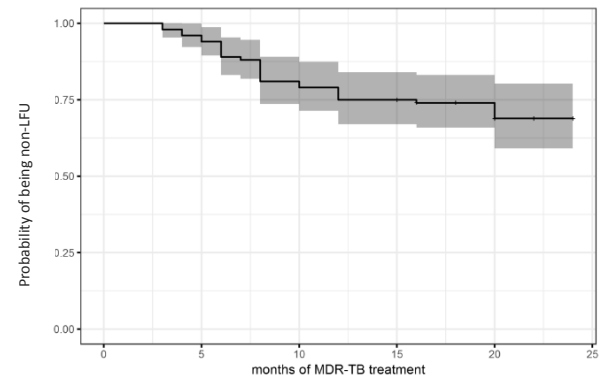

Cohort xi - UK (n=24)

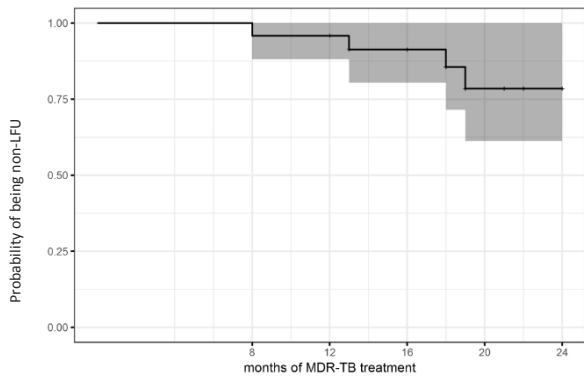

Cohort xii - Spain (n=21)

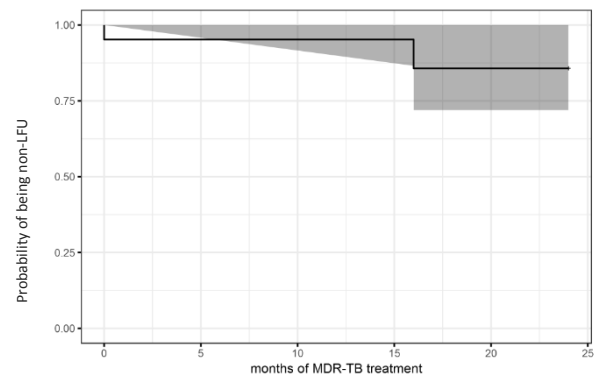

Cohort xiii - Vietnam (n=144)

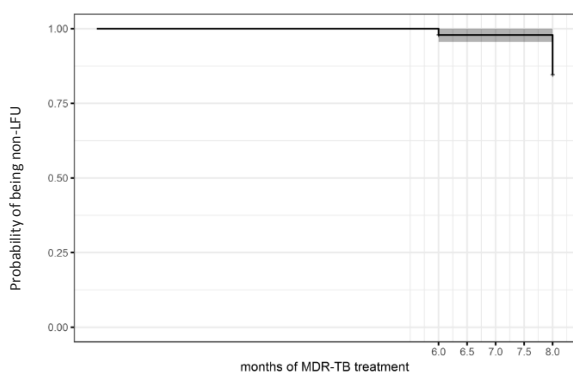

Cohort xiv - Latvia (n=949)

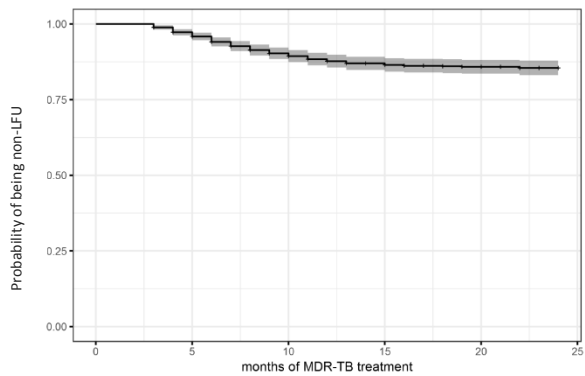

Cohort xv - France (n=30)

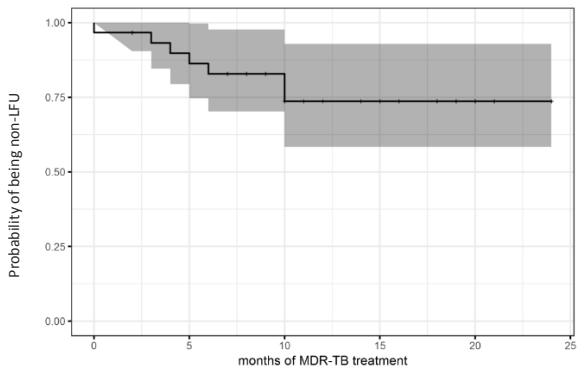

Cohort xvi - USA (n=236)

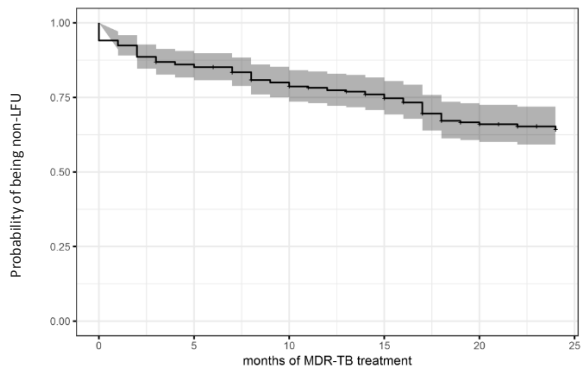

Cohort xvii - Russian Federation (n=577)

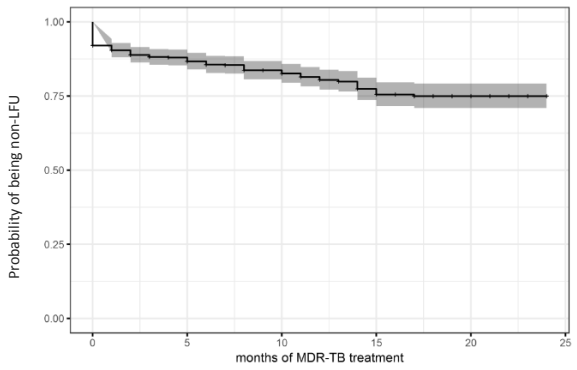

Cohort xviii - South Africa (n=33)

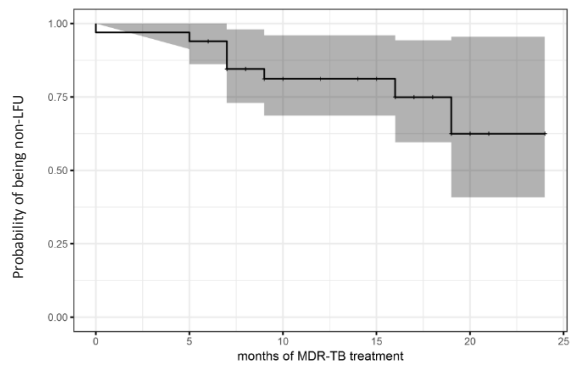

Cohort xix - South Korea (n=130)

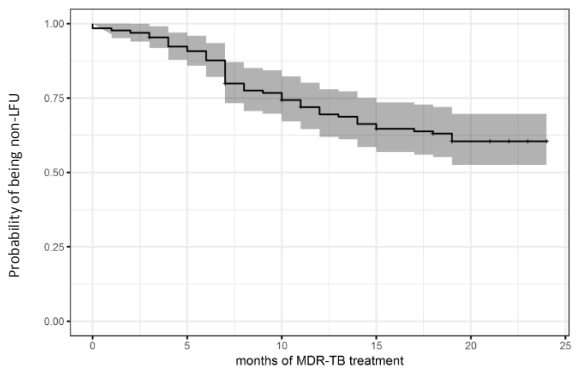

Cohort xx - Japan (n=59)

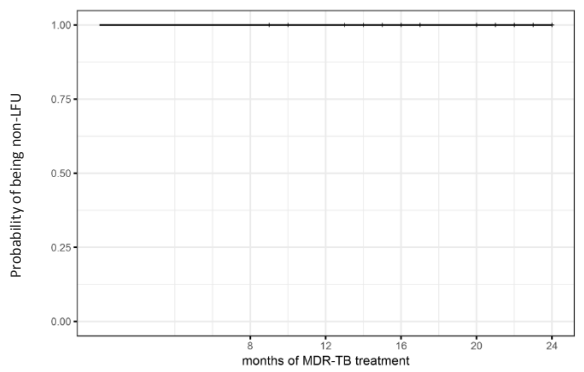

Cohort xxi - Philippines (n=146)

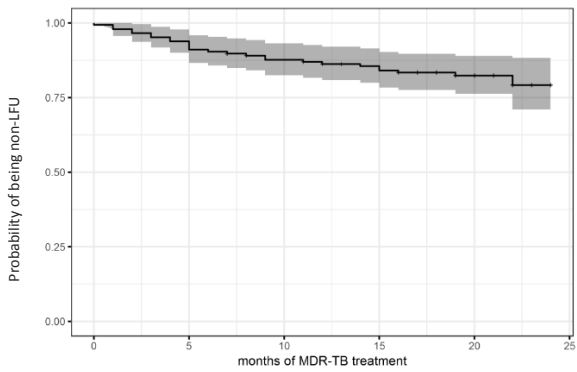

Cohort xxii - Iran (n=35)

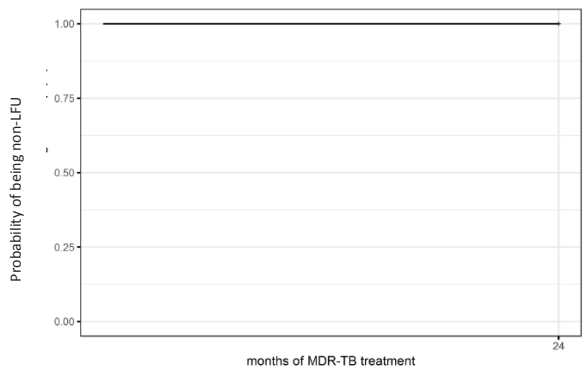

Cohort xxiii – Estonia (n=253)

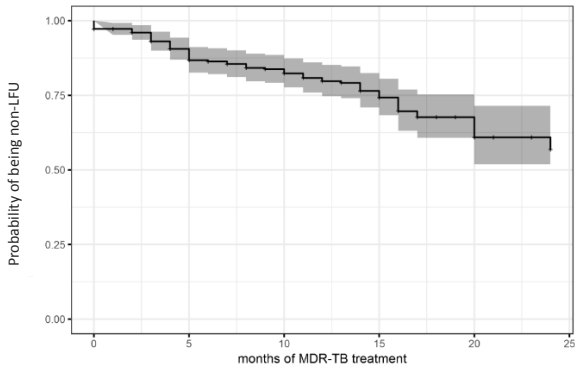

Cohort xxiv – South Africa (n=1,789)

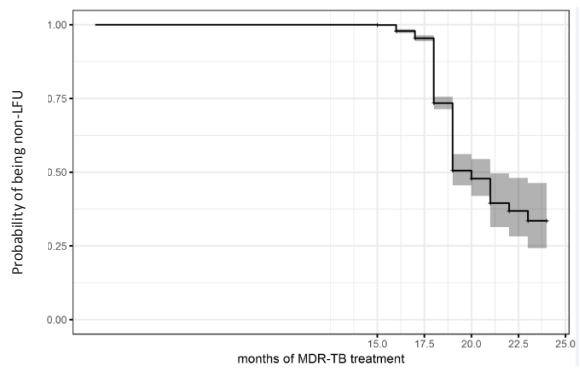

Cohort xxv – The Netherlands (n=41)

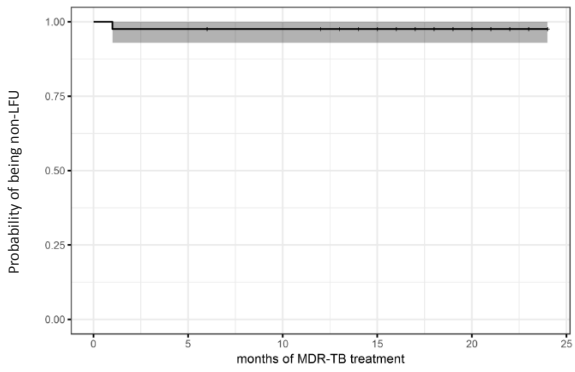

Cohort xxvi – South Korea (n=191)

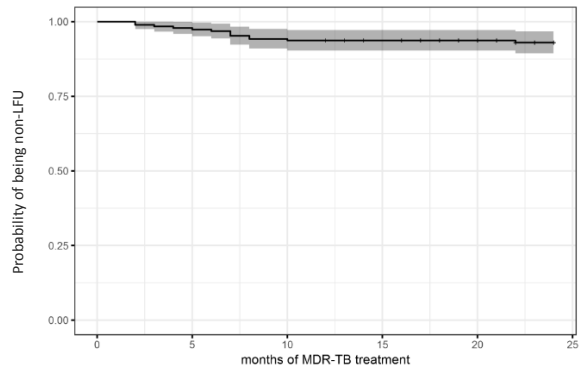

Cohort xxvii – Uzbekistan (n=67)

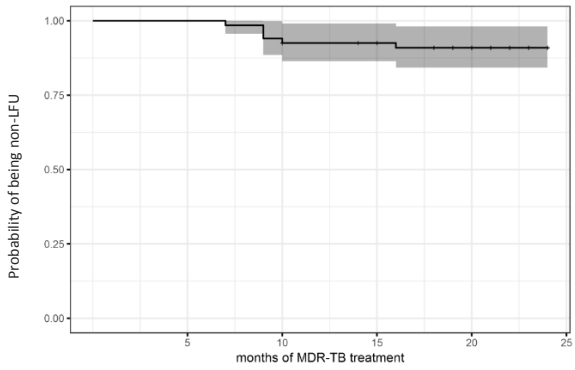

## Individual Cohort Studies Included in this Meta-analysis study

| First Author     | Years of Study Cohort | Location            | Total number of subjects with MDR-TB | Reference                                                                                                                                                                                                                                                                                                                                                                                                          |
|------------------|-----------------------|---------------------|--------------------------------------|--------------------------------------------------------------------------------------------------------------------------------------------------------------------------------------------------------------------------------------------------------------------------------------------------------------------------------------------------------------------------------------------------------------------|
| <i>Avendaño</i>  | 1986-1999             | Canada (Toronto)    | 72                                   | Avendano M, Goldstein RS (2000) Multidrug-resistant tuberculosis: long term follow-up of 40 non-HIV-infected patients. <i>Can Respir J</i> 7: 383–389.                                                                                                                                                                                                                                                             |
| <i>Burgos</i>    | 1983-2000             | USA (San Francisco) | 45                                   | Burgos M, Gonzalez LC, Paz EA, Gournis E, Paz A, et al. (2005) Treatment of multidrug-resistant tuberculosis in San Francisco: an outpatient-based approach. <i>Clin Infect Dis</i> 40: 968–975.                                                                                                                                                                                                                   |
| <i>Chan</i>      | 1984-1998             | USA (Colorado)      | 194                                  | Iseman MD, Madsen L, Goble M, Pomerantz M (1990) Surgical intervention in the treatment of pulmonary disease caused by drug-resistant mycobacterium tuberculosis. <i>Am Rev Respir Dis</i> 141: 623–625.<br>Chan ED, Laurel V, Strand MJ, Chan JF, Huynh MLN, et al. (2004) Treatment and outcome analysis of 205 patients with multidrug-resistant tuberculosis. <i>Am J Respir Crit Care Med</i> 169: 1103–1109. |
| <i>Chiang</i>    | 1992-1996             | Taiwan (Taipei)     | 125                                  | Chiang CY, Enarson DA, Yu MC, Bai KJ, Huang RM, et al. (2006) Outcome of pulmonary multidrug-resistant tuberculosis: a 6-yr follow-up study. <i>Eur Respir J</i> 28: 980–985.                                                                                                                                                                                                                                      |
| Cox              | 2003-2005             | Uzbekistan          | 77                                   | Cox HS, Stobdan K, Allamuratova S, Sizaire V, Tigay ZN, et al. (2007) Multidrug-resistant tuberculosis treatment outcomes in Karakalpakstan, Uzbekistan: treatment complexity and XDR-TB among treatment failures. <i>PLoS One</i> 2: e1126. doi:10.1371/journal.pone.0001126.                                                                                                                                     |
| <i>De Riemer</i> | 1994-2009             | Mexico (Veracruz)   | 47                                   | DeRiemer K, Garcia-Garcia L, Bodadilla-del-Valle M, Palacinós-Martinez M, Martínez-Gamboa A, et al. (2005) Does DOTS work in populations with drug resistant tuberculosis? <i>Lancet</i> 365: 1239–1345.                                                                                                                                                                                                           |

|                                |                      |                         |      |                                                                                                                                                                                                                                                                                                                                                                                                                                                                                                           |
|--------------------------------|----------------------|-------------------------|------|-----------------------------------------------------------------------------------------------------------------------------------------------------------------------------------------------------------------------------------------------------------------------------------------------------------------------------------------------------------------------------------------------------------------------------------------------------------------------------------------------------------|
| <i>Escudero</i>                | 1998-2000            | Spain (Madrid)          | 18   | Escudero E, Pena JM, Alvarez-Sala R, Vazquez JJ, Ortega A (2006) Multidrug resistant tuberculosis without HIV infection: success with individualised therapy. <i>Int J Tuberc Lung Dis</i> 10: 409–414.                                                                                                                                                                                                                                                                                                   |
| <i>Geerligs</i>                | 1987-1988, 1998-2008 | The Netherlands         | 43   | Geerligs WA, van Altena R, delange WCM, van Soolingen D, van der Werf TS (2000) Multidrug-resistant tuberculosis: long-term treatment outcome in the Netherlands. <i>Int J Tuberc Lung Dis</i> 4: 758–764.                                                                                                                                                                                                                                                                                                |
| <i>Granich/ Banerjee</i>       | 1994-2006            | USA (California)        | 100  | Granich RM, Oh P, Lewis B, Porco TC, Flood J (2005) Multidrug resistance among persons with tuberculosis in California, 1994–2003. <i>JAMA</i> 293: 2732– 2739.<br>Banerjee R, Allen J, Westenhouse J, Oh P, Elms W, et al. (2008) Extensively drug-resistant tuberculosis in California, 1993–2006. <i>Clin Infect Dis</i> 47: 450– 457.                                                                                                                                                                 |
| <i>DH Kim</i>                  | 2000-2002            | South Korea (Seoul)     | 1288 | Kim DH, Kim HJ, Park SK, Kong S, Kim YS, et al. (2008) Treatment outcomes and long-term survival in patients with extensively drug-resistant tuberculosis. <i>Am J Respir Crit Care Med</i> 178: 1075–1082.                                                                                                                                                                                                                                                                                               |
| <i>HR Kim</i>                  | 1980-2007            | South Korea (Seoul)     | 182  | Kim HR, Hwang SS, Kim HJ, Lee SM, Yoo CG, et al. (2007) Impact of extensive drug resistance on treatment outcomes in non-HIV-infected patients with multidrug-resistant tuberculosis. <i>Clin Infect Dis</i> 45: 1290–1295.                                                                                                                                                                                                                                                                               |
| <i>Kwon</i>                    | 1995-2005            | South Korea (Seoul)     | 129  | Kwon YS, Kim YH, Suh GY, Chung M, Kim H, et al. (2008) Treatment outcomes for HIV-uninfected patients with multidrug-resistant and extensively drug-resistant tuberculosis. <i>Clin Infect Dis</i> 47: 496–502.                                                                                                                                                                                                                                                                                           |
| <i>Leimane/Holtz/Riekstina</i> | 2000-2004            | Latvia (Stopinu Novads) | 945  | Riekstina V, Leimane V, Holtz TH, Leimans J, Wells CD (2007) Treatment outcome cohort analysis in an integrated DOTS and DOTS-Plus TB program in Latvia. <i>Int J Tuberc Lung Dis</i> 11: 585–587.<br>Leimane V, Riekstina V, Holtz TH, Zarovska E, Skripconoka V, et al. (2005) Clinical outcome of individualised treatment of multi-drug resistant tuberculosis in Latvia: a retrospective cohort study. <i>Lancet</i> 386: 318–326.<br>Holtz TH, Stenberg M, Kammerer S, Laserson KF, Riekstina V, et |

|                   |           |                             |     |                                                                                                                                                                                                                                                                                                                                                                   |
|-------------------|-----------|-----------------------------|-----|-------------------------------------------------------------------------------------------------------------------------------------------------------------------------------------------------------------------------------------------------------------------------------------------------------------------------------------------------------------------|
|                   |           |                             |     | al. (2006) Time to sputum culture conversion in multidrug-resistant tuberculosis: predictors and relationship to treatment outcome. <i>Ann Intern Med</i> 144: 650–659.                                                                                                                                                                                           |
| <i>Lockman</i>    | 2000-2002 | Estonia<br>(All centres)    | 218 | Lockman S, Kruuner A, Binkin N, Levina K, Wang YC, et al. (2001) Clinical outcomes of Estonian patients with primary multidrug-resistant versus drug-susceptible tuberculosis. <i>Clin Infect Dis</i> 32: 373–80                                                                                                                                                  |
| <i>Masjedi</i>    | 2002-2006 | Iran                        | 27  | Masjedi MR, Tabarsi P, Chitsaz P, Baghaei P, Miraeidi M, et al. (2008) Outcome of treatment of MDR-TB patients with standardised regimens, Iran, 2002–2006. <i>Int J Tuberc Lung Dis</i> 12: 750–755.                                                                                                                                                             |
| <i>Mitnick</i>    | 1996-2002 | Peru<br>(Lima)              | 654 | Mitnick C, Bayona J, Palacios E, Shin SS, Furin J, et al. (2003) Community based therapy for multidrug-resistant tuberculosis in Lima, Peru. <i>N Engl J Med</i> 348: 119–128.<br>Mitnick C, Shin SS, Seung KJ, Rich ML, Atwood SS, et al. (2010) Comprehensive treatment of extensively drug-resistant tuberculosis. <i>N Engl J Med</i> 359: 563–574.           |
| <i>Munsiff/Li</i> | 1992-1997 | USA<br>(New York)           | 671 | Munsiff SS, Ahuja SD, Li J, Driver CR (2006) Public-private collaboration for multidrug-resistant tuberculosis control in New York city. <i>Int J Tuberc Lung Dis</i> 10: 639–648.<br>Li J, Burzynski JN, Lee YA, Berg D, Driver CR, et al. (2004) Use of therapeutic drug monitoring for multidrug-resistant tuberculosis patients. <i>Chest</i> 126: 1770–1776. |
| <i>Narita</i>     | 1993-1997 | USA<br>(Florida)            | 66  | Narita M, Alonso P, Lizardo M, Hollender E, Pitchenik A, et al. (2001) Treatment experience of multidrug-resistant tuberculosis in Florida, 1994–1997. <i>Chest</i> 120: 343–348                                                                                                                                                                                  |
| <i>O’Riordan</i>  | 1982-2004 | UK<br>( London)             | 28  | O’Riordan P, Schwab U, Logan S, Cooke G, Wilkinson RJ, et al. (2008) Rapid molecular detection of rifampicin resistance facilitates early diagnosis and treatment of multidrug-resistant tuberculosis: case control study. <i>PLoS One</i> 3: e3173.<br>doi:10.1371/journal.pone.0003173                                                                          |
| <i>Palmero</i>    | 1996-1999 | Argentina<br>(Buenos Aires) | 112 | Palmero DJ, Ambroggi M, Brea A, De Lucas M, Fulgenzi A, et al. (2004) Treatment and follow-up of HIV-negative multidrug-resistant tuberculosis patients in an infectious diseases reference                                                                                                                                                                       |

|                     |           |                                                             |     |                                                                                                                                                                                                                                                                                                                                            |
|---------------------|-----------|-------------------------------------------------------------|-----|--------------------------------------------------------------------------------------------------------------------------------------------------------------------------------------------------------------------------------------------------------------------------------------------------------------------------------------------|
|                     |           |                                                             |     | hospital, Buenos Aires, Argentina. Int J Tuberc Lung Dis 8: 778–784                                                                                                                                                                                                                                                                        |
| <i>Park</i>         | 1998-2002 | South Korea (Masan)                                         | 131 | Park SK, Lee WC, Lee DH, Mitnick CD, Han L, et al. (2004) Self-administered, standardized regimens for multidrug-resistant tuberculosis in South Korea. Int J Tuberc Lung Dis 8: 361–368                                                                                                                                                   |
| <i>Perez-Guzman</i> | 1994-1995 | Mexico                                                      | 33  | Pe´rez-Guzma´n C, Vargas MH, Martinez-Rossier LA, Torres-Cruz A, Villarreal-Velarde H (2002) Results of a 12-month regimen for drug-resistant pulmonary tuberculosis. Int J Tuberc Lung Dis 6: 1102–1109                                                                                                                                   |
| <i>Quy</i>          | 1998-2000 | Vietnam (Ho Chi Minh City)                                  | 157 | Quy HT, Cobelens FGJ, Lan NTN, Buu TN, Lambregts CSB, et al. (2006) Treatment outcomes by drug resistance and HIV status among tuberculosis patients in Ho Chi Minh City, Vietnam. Int J Tuberc Lung Dis 10: 45–51.                                                                                                                        |
| <i>Schaaf</i>       | 1998-2002 | South Africa (Western Cape, Capetown Metropole, West Coast) | 36  | Schaaf HS, Shean K, Donald PR (2003) Culture confirmed multidrug resistant tuberculosis: diagnostic delay, clinical features, and outcome. Arch Dis Child 88:1106–1111                                                                                                                                                                     |
| <i>Shin</i>         | 2000-2004 | Russian Federation (Tomsk)                                  | 535 | Shin SS, Pasechnikov AD, Gelmanova IY, Peremitin GG, Strelis AK, et al. (2006) Treatment outcomes in an integrated civilian and prison MDR-TB treatment program in Russia. Int J Tuberc Lung Dis 10: 402–408                                                                                                                               |
| <i>Shiraishi</i>    | 2000-2007 | Japan (Tokyo)                                               | 61  | Shiraishi Y, Nakalima Y, Katsuragi N, Kurai M, Takahashi N (2004) Resectional surgery combined with chemotherapy remains the treatment of choice for multidrug-resistant tuberculosis. J Thorac Cardiovasc Surg 128: 523–528.                                                                                                              |
| <i>Tupasi</i>       | 1999-2003 | Philippines                                                 | 159 | Tupasi TE, Quelapio MID, Orillaza RB, Alcantara C, Mira NRC, et al. (2003) DOTS-Plus for multidrug-resistant tuberculosis in the Philippines: global assistance urgently needed. Tuberculosis 83: 52–58.<br>Tupasi TE, Gupta R, Quelapio MID, Orillaza RB, Mira NR, et al. (2006) Feasibility and cost-effectiveness of treating multidrug |



|                |           |                |    |                                                                                                                                                                                                                                                                                                                                                                                                     |
|----------------|-----------|----------------|----|-----------------------------------------------------------------------------------------------------------------------------------------------------------------------------------------------------------------------------------------------------------------------------------------------------------------------------------------------------------------------------------------------------|
|                |           |                |    | resistant tuberculosis: a cohort study in the Philippines. PLoS Med 3: e352. doi:10.1371/journal.pmed.0030352                                                                                                                                                                                                                                                                                       |
| <i>Uffredi</i> | 1998-1999 | France (Paris) | 41 | Uffredi ML, Truffot-Pernot C, Dautzenberg B, Renard M, Jarlier V, et al. (2007) An intervention programme for the management of multidrug-resistant tuberculosis in France. Intl J Antimicrob Agents 29: 434–439.                                                                                                                                                                                   |
| <i>Yew</i>     | 1990-1997 | Hong Kong      | 99 | Yew WW, Chan CK, Leung CC, Chau CH, Tam CM, et al. (2003) Comparative roles of levofloxacin and ofloxacin in the treatment of multidrug resistant tuberculosis. Chest 124: 1476–1481.<br>Yew WW, Chan CK, Chau CH, Tam CM, Leung CC, et al. (2000) Outcomes of patients with multidrug-resistant pulmonary tuberculosis treated with ofloxacin/levofloxacin-containing regimens. Chest 117: 744–751 |

### Individual studies excluded from our analysis

| First Author    | Years of Study Cohort | Location                   | Total number of subjects with MDR-TB | Reference                                                                                                                                                                                                                                                                                                                                                                                                             |
|-----------------|-----------------------|----------------------------|--------------------------------------|-----------------------------------------------------------------------------------------------------------------------------------------------------------------------------------------------------------------------------------------------------------------------------------------------------------------------------------------------------------------------------------------------------------------------|
| <i>Holtz</i>    | 2000-2004             | South Africa (All centres) | 2174                                 | Holtz TH, Lancaster J, Laserson KF, Wells CD, Thorpe L, et al. (2006) Risk factors associated with default from multidrug-resistant tuberculosis treatment, South Africa, 1999–2001. Int J Tuberc Lung Dis 10: 649–655                                                                                                                                                                                                |
| <i>Migliori</i> | 2001-2004             | Italy                      | 82                                   | Migliori GB, Espinal M, Danilova ID, Punga VV, Grzemska M, et al. (2002) Frequency of recurrence among MDR-TB cases ‘successfully’ treated with standardised short-course chemotherapy. Int J Tuberc Lung Dis 6: 858–864.<br>Migliori GB, Besozzi G, Girardi E, Kliiman K, Lange C, et al. (2007) Clinical and operational value of the extensively drug-resistant tuberculosis definition. Eur Respir J 30: 623–626. |

|                 |           |            |     |                                                                                                                                                                                                                                                                                                                                                                                                                     |
|-----------------|-----------|------------|-----|---------------------------------------------------------------------------------------------------------------------------------------------------------------------------------------------------------------------------------------------------------------------------------------------------------------------------------------------------------------------------------------------------------------------|
| <i>Van Deun</i> | 1997-2010 | Bangladesh | 607 | Van Deun A, Salim MAH, Das APK, Bastian I, Portaels F (2004) Results of a standardised regimen for multidrug-resistant tuberculosis in Bangladesh. <i>Int J Tuberc Lung Dis</i> 8: 560–567.<br>Van Deun A, Maug AKJ, Salim MAH, Das PK, Sarker MR, et al. (2010) Short, highly effective and inexpensive standardized treatment of multidrug-resistant tuberculosis. <i>Am J Respir Crit Care Med</i> 182: 684–692. |
|-----------------|-----------|------------|-----|---------------------------------------------------------------------------------------------------------------------------------------------------------------------------------------------------------------------------------------------------------------------------------------------------------------------------------------------------------------------------------------------------------------------|
